# Supplementary material
Source: publisher site journal article supplement (https://www.dovepress.com/article/499351)
Supplement: Supplementary file 1 [file get_supplementary_file.php]

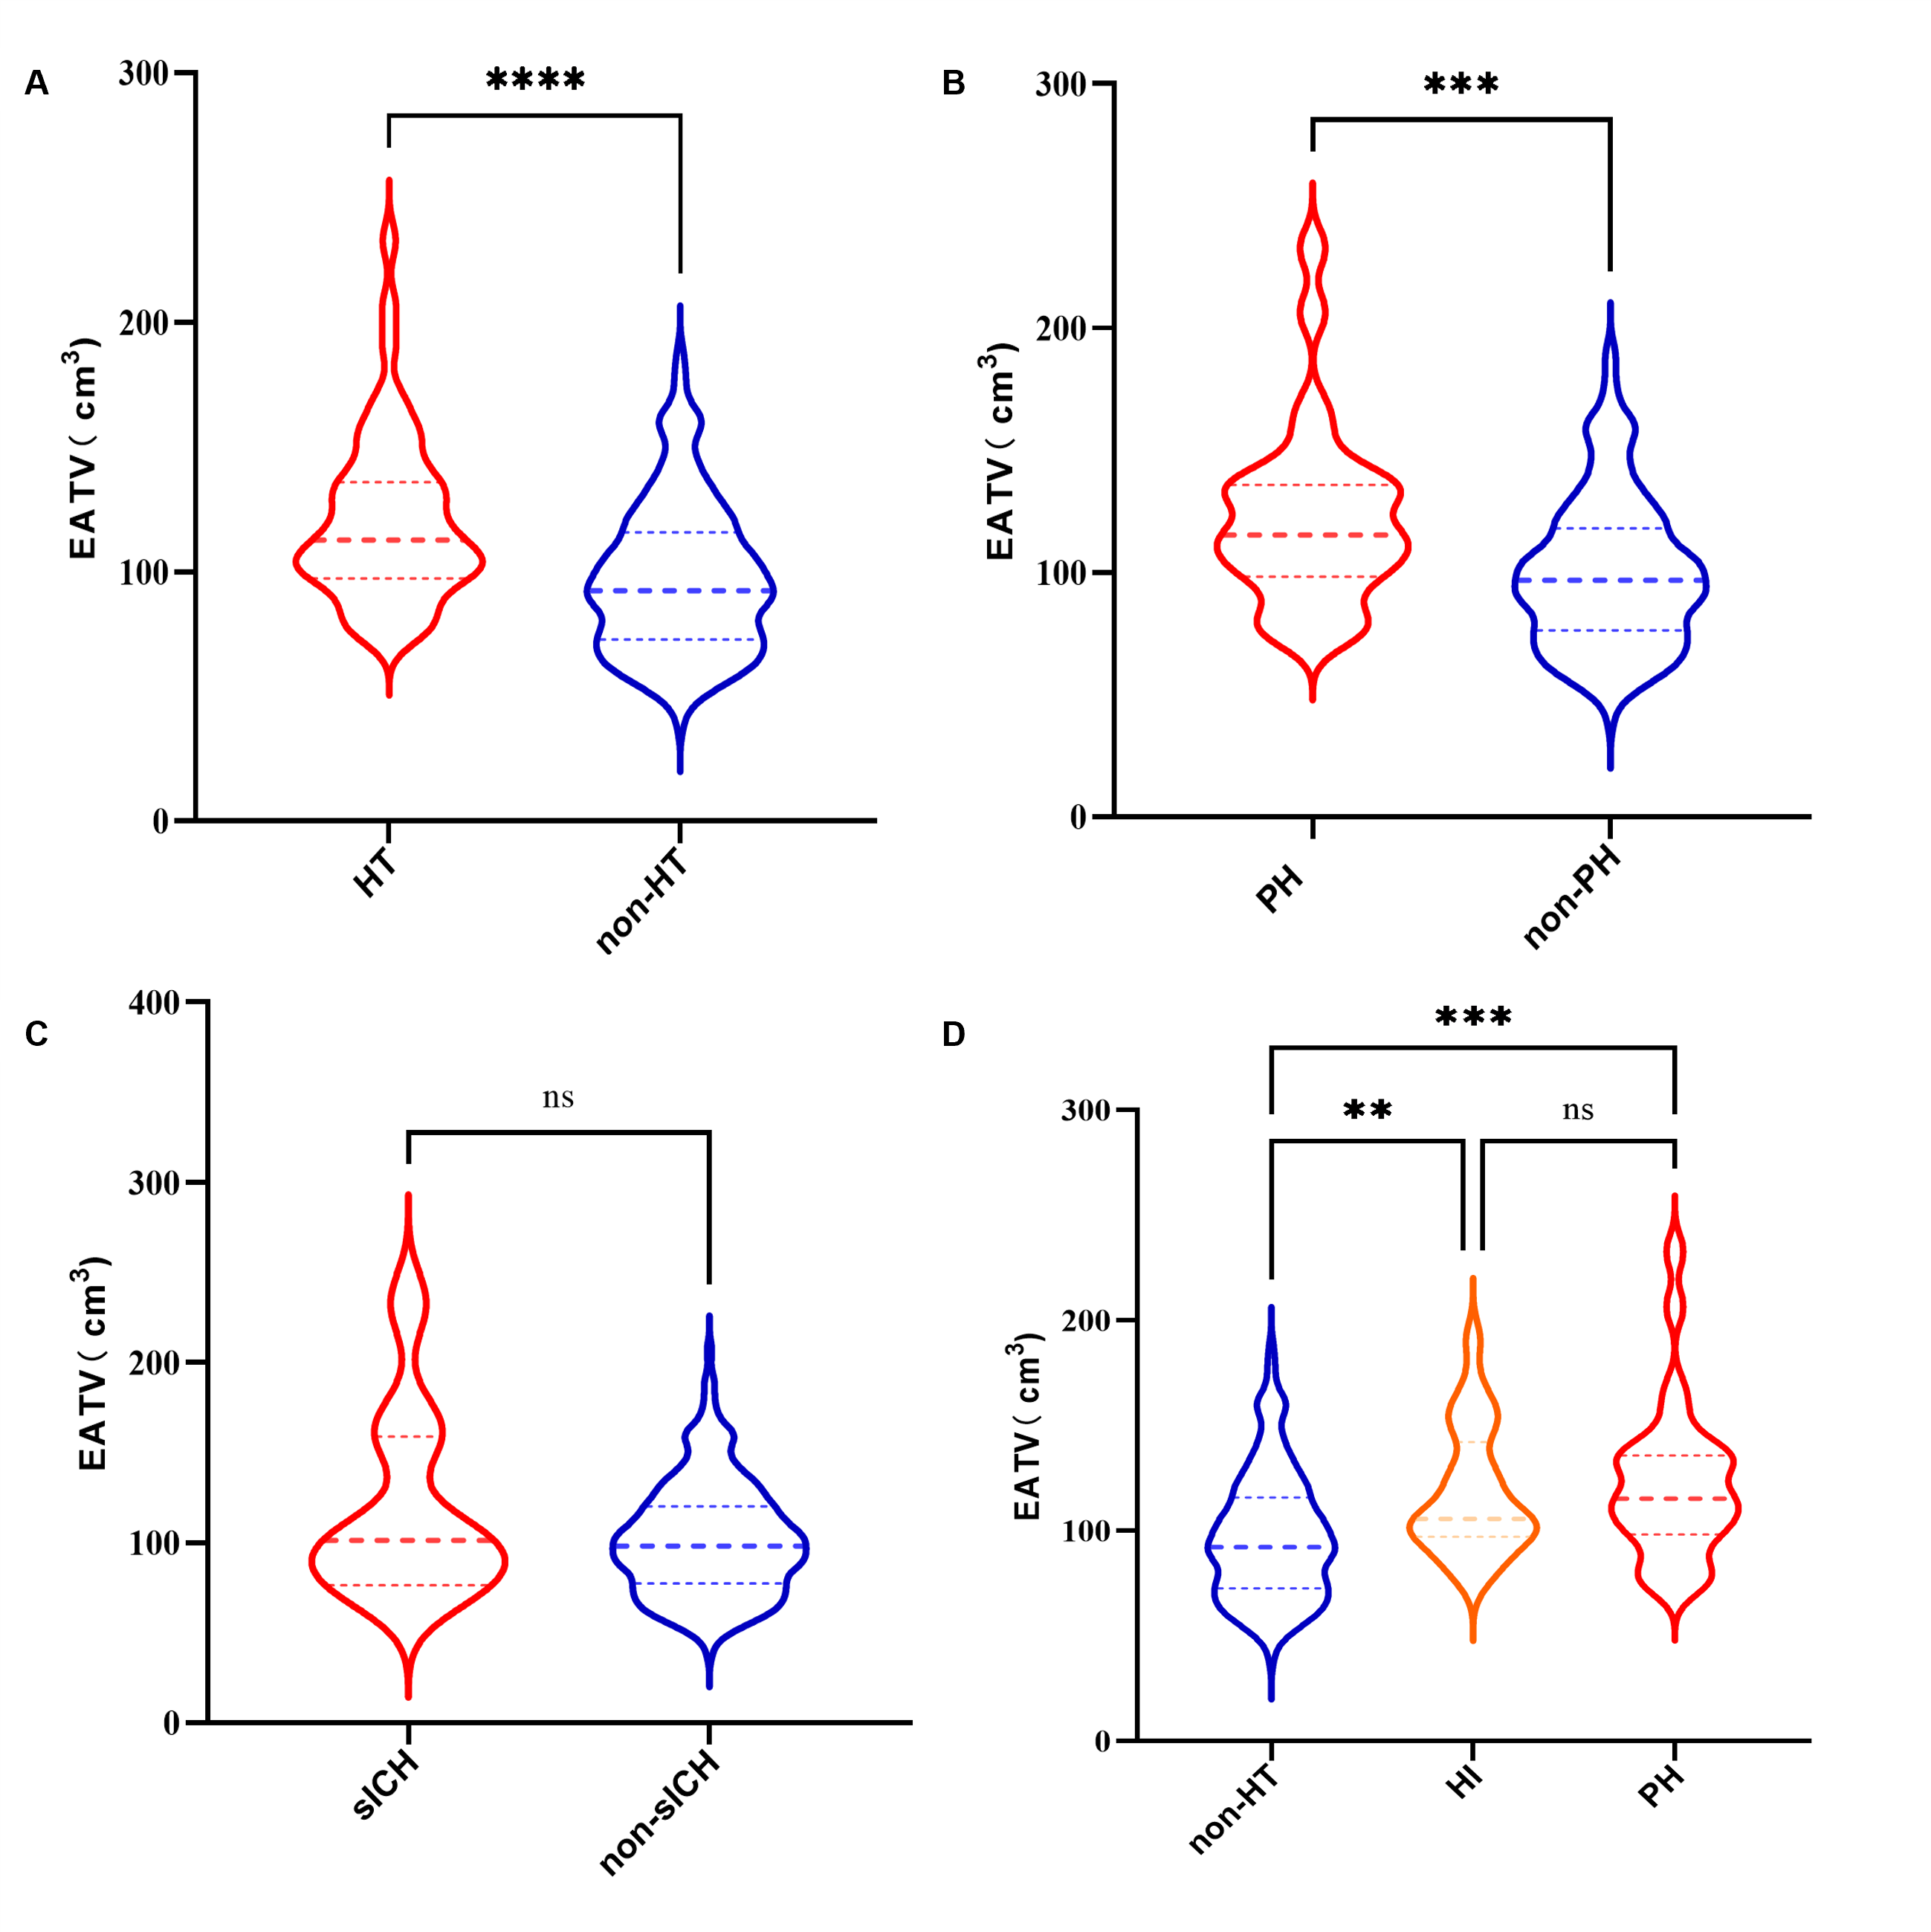


**Supplementary Figure 1:** Compare the differences of EATV across different levels of HT.

**(A)** shows HT groups exhibited significantly higher EATV compared to the non-HT group (*p* < 0.0001). (**B)** shows PH groups exhibited significantly higher EATV compared to the non-PH group (*p* < 0.001). (**C)** shows there was no statistically significant difference between the sICH and non-sICH groups (*p＞0.05*). (**D)** shows both HI and PH groups exhibited significantly higher EATV compared to the non-HT group (both p < 0.01), but there was no statistically significant difference between the HI and PH groups.

**Notes:** ** *p* < 0.01, *** *p* < 0.001, **** *p* < 0.0001, ns*p＞0.05.*

**Abbreviations:** EATV, epicardial adipose tissue volume; HT, hemorrhagic transformation; HI, hemorrhagic infarction; PH, parenchymal haemorrhage; sICH, symptomatic intracranial haemorrhage.


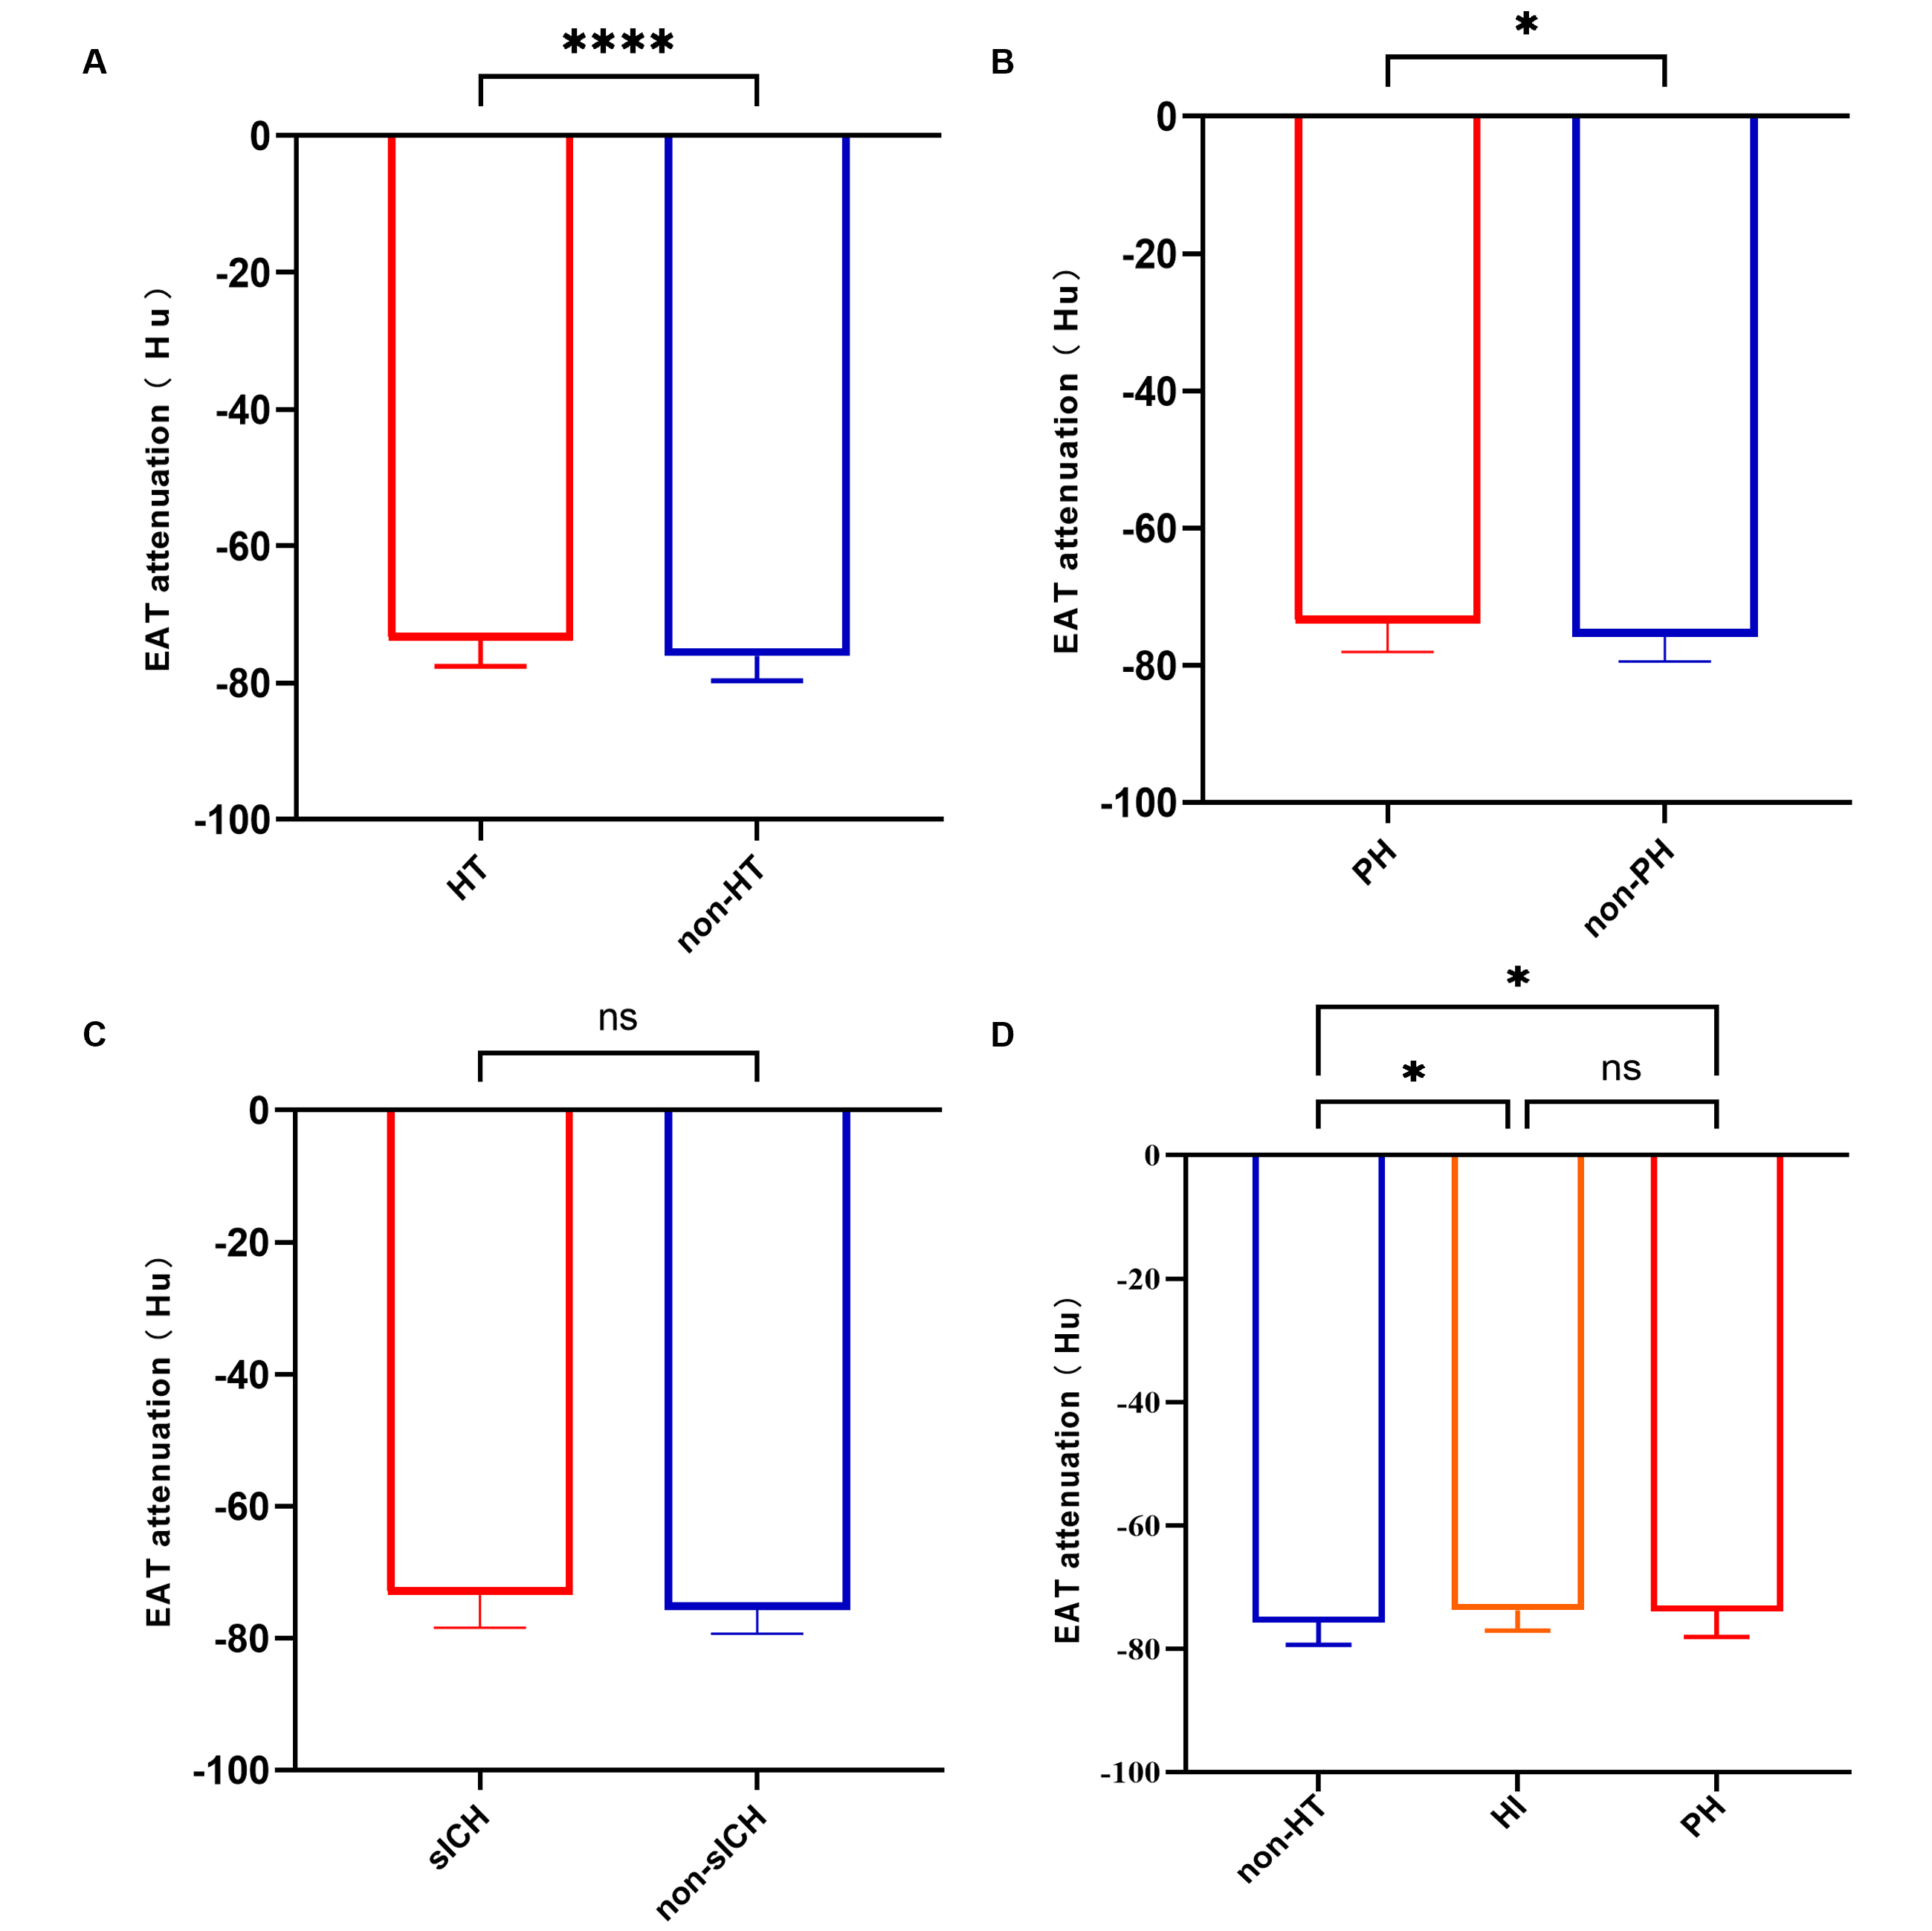


**Supplementary Figure 2:** Compare the differences of EAT attenuation across different levels of HT.

(**A)** shows HT groups exhibited significantly higher EAT attenuation compared to the non-HT group (*p* < 0.0001). (**B)** shows PH groups exhibited significantly higher EAT attenuation compared to the non-PH group (*p* < 0.05). (**C)** shows there was no statistically significant difference between the sICH and non-sICH groups (*p＞0.05*). (**D)** shows both HI and PH groups exhibited significantly higher EAT attenuation compared to the non-HT group (both p < 0.05), but there was no statistically significant difference between the HI and PH groups.

**Notes:** * *p* < 0.05, **** *p* < 0.0001, ns*p＞0.05*

**Abbreviations:** EAT, epicardial adipose tissue; HT, hemorrhagic transformation; HI, hemorrhagic infarction; PH, parenchymal haemorrhage; sICH, symptomatic intracranial haemorrhage.

**
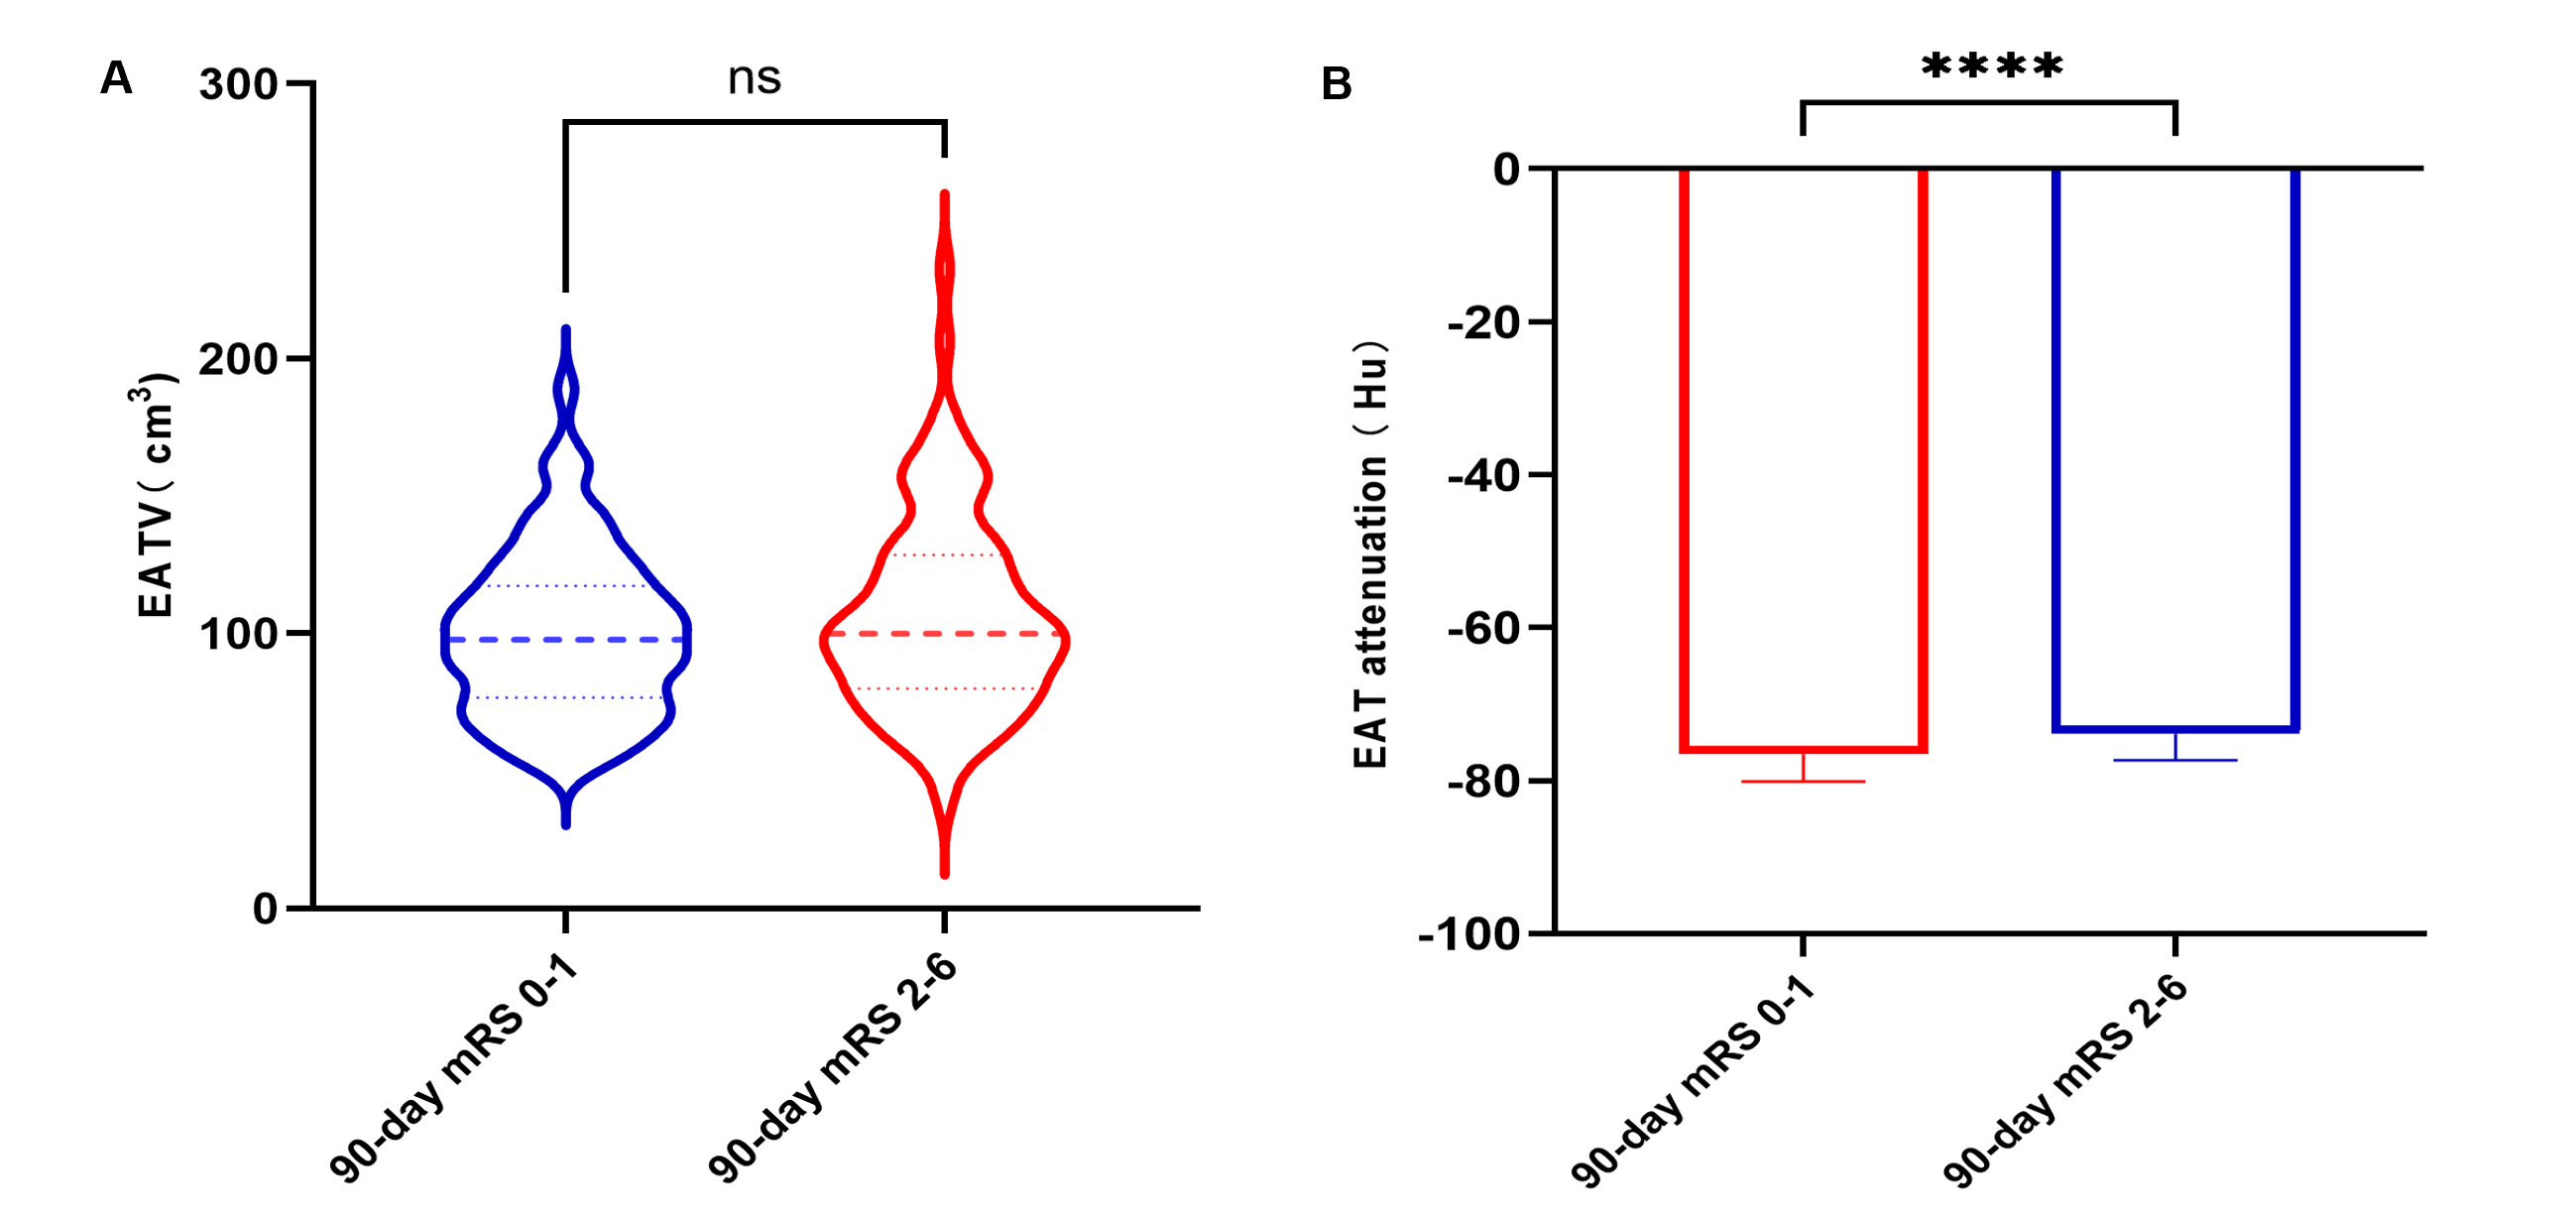
**[**Supplementary Figure 3**](https://www.ncbi.nlm.nih.gov/pmc/articles/PMC11300661/figure/X10/)**:** The difference in functional outcomes at 90 days with EATV and EAT attenuation.

1. shows there was no significant difference observed in EATV between the two groups (*p > 0.05*). **(B)** shows compared to the group of patients with excellent outcomes, those with poor outcomes exhibited higher EAT attenuation (*p* < 0.0001).

**Notes:** **** *p* < 0.0001, ns*p > 0.05*.

**Abbreviations:** EAT, epicardial adipose tissue; EATV, epicardial adipose tissue volume; mRS, modified Rankin Scale.

**Supplementary Table 1** Univariate logistic regression analysis, stratified by the presence of HT, PH

| **Variables** | **HT** | | **PH** | |
| --- | --- | --- | --- | --- |
| **OR (OR95%CI)** | **p** | **OR (OR95%CI)** | **p** |
| Age (years), mean±SD | 1.037 (1.008, 1.067) | 0.012* | 1.037 (1.000, 1.076) | 0.048* |
| Male, (n, %) | 0.695 (0.368, 1.315) | 0.264 | 0.547 (0.246, 1.217) | 0.140 |
| ONT (min), median (M25, M75) | 1.000 (0.995, 1.004) | 0.873 | 0.998 (0.991, 1.00) | 0.477 |
| EATV (cm3), median (M25, M75) | 1.023 (1.012, 1.033) | <0.001* | 1.020 (1.008, 1.032) | 0.001* |
| EAT attenuation (HU), mean±SD | 1.192 (1.086, 1.309) | <0.001* | 1.150 (1.030, 1.284) | 0.013* |
| BMI (Kg/m2), mean±SD | 0.971 (0.891, 1.059) | 0.507 | 0.970 (0868, 1.083) | 0.586 |
| Systolic blood pressure (mmHg), mean±SD | 0.992 (0.976, 1.008) | 0.305 | 0.996 (0.976, 1.016) | 0.698 |
| Diastolic blood pressure (mmHg), mean±SD | 1.002 (0.980, 1.025) | 0.865 | 0.984 (0.956, 1.013) | 0.274 |
| mRS score before onset, median (M25, M75) | 1.010 (0.709, 1.439) | 0.956 | 0.949 (0.584, 1.542) | 0.832 |
| NIHSS score before IVT, median (M25, M75) | 1.137 (1.076, 1.203) | <0.001* | 1.134 (1.071, 1.200) | <0.001* |
| TOAST, (n, %) |  | <0.001* |  | <0.001* |
| SAA | Reference | Reference | Reference | Reference |
| LAA | 8.854 (3.666, 21.384) | <0.001* | 14.271 (3.958, 51.452) | <0.001* |
| CE | 72.600 (21.756, 242.265) | <0.001* | 26.863 (6.723, 107.328) | <0.001* |
| Risk factors, (n, %) |  |  |  |  |
| Hypertension | 1.061 (0.561, 2.004) | 0.856 | 1.297 (0.582, 2.891) | 0.524 |
| Diabetes mellitus | 2.530 (1.283, 4.990) | 0.007 | 1.752 (0.740, 4.146) | 0.202 |
| Coronary artery disease | 1.223 (0.552, 2.712) | 0.620 | 0.553 (0.158, 1.932) | 0.354 |
| Atrial fibrillation | 10.041 (4.642, 21.716) | <0.001* | 4.194 (1.775, 9.910) | 0.001* |
| Stroke | 0.636 (0.264, 1.529) | 0.312 | 0.719 (0.236, 2.195) | 0.563 |
| Smoking history | 0.509 (0.249, 1.039) | 0.064 | 0.492 (0.191, 1.270) | 0.143 |

**Continued Supplementary Table 1** Univariate logistic regression analysis, stratified by the presence of HT, PH

| **Variables** | **HT** | | **PH** | |
| --- | --- | --- | --- | --- |
| **OR (OR95%CI)** | **p** | **OR (OR95%CI)** | **p** |
| Alcohol history | 0.593 (0.277, 1.271) | 0.179 | 0.424 (0.141, 1.276) | 0.127 |
| Medication history, (n, %) |  |  |  |  |
| Antiplatelets | 0.844 (0.269, 2.644) | 0.771 | 0.786 (0.172, 3.586) | 0.756 |
| Statins | 0.368 (0.046, 2.976) | 0.349 | 0.794 (0.097, 6.518) | 0.830 |
| Anticoagulants | 5.388 (0.876, 33.152) | 0.069 | 5.103 (0.814, 31.977) | 0.082 |
| Antihypertensive | 0.790 (0.383, 1.629) | 0.523 | 0.424 (0.141, 1.276) | 0.127 |
| Antidiabetic | 1.780 (0.779, 4.068) | 0.171 | 1.472 (0.514, 4.210) | 0.471 |
| Laboratory tests before IVT |  |  |  |  |
| Blood glucose (mmol/L), median (M25, M75) | 1.095 (1.004, 1.193) | 0.039* | 1.069 (0.962, 1.189) | 0.215 |
| BUN (mmol/L), median (M25, M75) | 1.038 (0.884, 1.220) | 0.650 | 1.052 (0.860, 1.288) | 0.622 |
| Creatinine (μmol/L), median (M25, M75) | 0.995 (0.982, 1.009) | 0.512 | 0.997 (0.980, 1.014) | 0.724 |
| Albumin (g/L), median (M25, M75) | 0.833 (0.764, 0.908) | <0.001* | 0.862 (0.786, 0.947) | 0.002* |
| WBC (109/L), median (M25, M75) | 1.015 (0.890, 1.157) | 0.825 | 1.062 (0.904, 1.248) | 0.463 |
| Neutrophil (109/L), median (M25, M75) | 1.048 (0.909, 1.209) | 0.516 | 1.161 (0.982, 1.372) | 0.081 |
| Lymphocyte (109/L), median (M25, M75) | 0.534 (0.330, 0.863) | 0.011* | 0.564 (0.304, 1.045) | 0.069 |
| NLR, median (M25, M75) | 1.165 (0.998, 1.360) | 0.053 | 1.247 (1.045, 1.487) | 0.014* |
| Monocyte (109/L), median (M25, M75) | 1.400 (0.380, 5.154) | 0.613 | 2.667 (0.636, 11.196) | 0.180 |
| PLT (1012/L), median (M25, M75) | 0.987 (0.980, 0.994) | <0.001* | 0.992 (0.985, 1.000) | 0.064 |
| CRP (mg/L), median (M25, M75) | 1.260 (1.084, 1.465) | 0.003* | 1.258 (1.071, 1.477) | 0.005* |
| INR (109/L), median (M25, M75) | 0.404 (0.021, 7.797) | 0.548 | 0.593 (0.029, 12.275) | 0.735 |

**Continued Supplementary Table 1** Univariate logistic regression analysis, stratified by the presence of HT, PH

| **Variables** | **HT** | | **PH** | |
| --- | --- | --- | --- | --- |
| **OR (OR95%CI)** | **p** | **OR (OR95%CI)** | **p** |
| Fibrinogen (g/L), median (M25, M75) | 1.567 (1.007, 2.438) | 0.046* | 1.447 (0.962, 2.177) | 0.076 |

Notes: “*” means statistically significant differences (p <0.05).
Abbreviations: HT, hemorrhagic transformation; PH, parenchymal haemorrhage; ONT, onset-to-needle time; EATV, epicardial adipose tissue volume; EAT,epicardial adipose tissue; BMI, body mass index; mRS, modified Rankin Scale; NIHSS, National Institute of Health Stroke Scale; IVT, intravenous thrombolysis; TOAST, Trial of Org 10172 in Acute Stroke Treatment; SAA, small-vessel occlusion ; LAA, large-artery atherosclerosis; CE, cardioembolism; BUN, blood urea nitrogen; WBC, white blood cells; NLR, neutrophil-to-lymphocyte ratio; PLT, platelet; CRP, C-reactive protein; INR, international normalized ratio.

p, significance of univariate Logistic analysis.

**Supplementary Table 2** Univariate logistic regression analysis, stratified by 90-day mRS

| **Variables** | **90-day mRS 2-6** | |
| --- | --- | --- |
| **OR (OR95%CI)** | ***p*** |
| Age (years), (M25, M75) | 1.034 (1.009, 1.059) | 0.007* |
| Male (n, %) | 0.653 (0.373, 1.144) | 0.136 |
| ONT (min), median (M25, M75) | 0.998 (0.993, 1.002) | 0.255 |
| EATV (cm3), median (M25, M75) | 1.007 (0.998, 1.015) | 0.113 |
| EAT attenuation (HU), mean±SD | 1.254 (1.147, 1.372) | < 0.001* |
| BMI (Kg/m2), mean±SD | 0.968 (0.899, 1.044) | 0.4 |
| Systolic blood pressure (mmHg), mean±SD | 1.009 (0.996, 1.023) | 0.186 |
| Diastolic blood pressure (mmHg), mean±SD | 0.989 (0.969, 1.008) | 0.26 |
| mRS score before onset, median (M25, M75) | 1.438 (1.045, 1.979) | 0.026* |
| NIHSS score before IVT, median (M25, M75) | 1.228 (1.147, 1.315) | < 0.001* |
| TOAST, (n, %) |  | 0.001* |
| SAA | Reference | Reference |
| LAA | 1.697 (0.913, 3.153) | 0.094 |
| CE | 4.829 (2.005, 11.632) | < 0.001* |
| Risk factors, (n, %) |  |  |
| Hypertension | 1.065 (0.611, 1.854) | 0.825 |
| Diabetes mellitus | 0.877 (0.459, 1.675) | 0.691 |
| Coronary artery disease | 0.826 (0.399, 1.710) | 0.607 |
| Atrial fibrillation | 2.815 (1.383, 5.732) | 0.004* |
| Stroke | 1.527 (0.776, 3.006) | 0.221 |
| Smoking history | 0.507 (0.279, 0.918) | 0.025* |
| Alcohol history | 0.461 (0.239, 0.891) | 0.021* |
| Medication history, (n, %) |  |  |
| Antiplatelets | 0.542 (0.190, 1.547) | 0.252 |
| Statins | 0.721 (0.181, 2.866) | 0.643 |
| Anticoagulants | 1.141 (0.187, 6.966) | 0.887 |
| Antihypertensive | 0.574 (0.303, 1.087) | 0.088 |
| Antidiabetic | 0.787 (0.352, 1.762) | 0.561 |
| Laboratory tests before IVT |  |  |
| Blood glucose (mmol/L), median (M25, M75) | 1.034 (0.954, 1.120) | 0.417 |
| BUN (mmol/L), median (M25, M75) | 1.123 (0.973,1.295) | 0.112 |
| Creatinine (μmol/L), median (M25, M75) | 0.997 (0.986, 1.008) | 0.603 |
| Albumin (g/L), median (M25, M75) | 0.867 (0.803, 0.936) | < 0.001* |
| WBC (109/L), median (M25, M75) | 0.995 (0.887, 1.116) | 0.93 |
| Neutrophil (109/L), median (M25, M75) | 1.001 (0.881, 1.137) | 0.987 |
| Lymphocyte (109/L), median (M25, M75) | 0.784 (0.546, 1.124) | 0.186 |
| NLR, median (M25, M75) | 1.064 (0.921, 1.229) | 0.4 |
| Monocyte (109/L), median (M25, M75) | 1.381 (0.423, 4.510) | 0.593 |
| PLT (1012/L), median (M25, M75) | 0.992 (0.987, 0.998) | 0.005* |
| CRP (mg/L), median (M25, M75) | 1.103 (0.962, 1.265) | 0.159 |
| INR (109/L), median (M25, M75) | 33.698 (1.140, 995.819) | 0.042* |

**Continued Supplementary Table 2** Univariate logistic regression analysis, stratified by 90-day mRS

| **Variables** | **90-day mRS 2-6** | |
| --- | --- | --- |
| **OR (OR95%CI)** | ***p*** |
| Fibrinogen (g/L), median (M25, M75) | 1.318 (0.921, 1.886) | 0.131 |

**Notes:** “*” means statistically significant differences (p < 0.05). **Abbreviations:** HT, hemorrhagic transformation; PH, parenchymal haemorrhage; ONT, onset-to-needle time; EATV, epicardial adipose tissue volume; EAT,epicardial adipose tissue; BMI, body mass index; mRS, modified Rankin Scale; NIHSS, National Institute of Health Stroke Scale; IVT, intravenous thrombolysis; TOAST, Trial of Org 10172 in Acute Stroke Treatment; SAA, small-vessel occlusion ; LAA, large-artery atherosclerosis; CE, cardioembolism; BUN, blood urea nitrogen; WBC, white blood cells; NLR, neutrophil-to-lymphocyte ratio; PLT, platelet; CRP, C-reactive protein; INR, international normalized ratio.
p, significance of univariate Logistic analysis.
